# Supplementary material for: Nageotte nodules in human DRG reveal neurodegeneration in painful diabetic neuropathy
Source: Research Square preprint supplement (doi:10.21203/rs.3.rs-5006011/v1), 2024-09-27
Supplement: Supplementary file 2 [file 5fbc81d61ddb23044aeaeeef.xlsx]

## Sheet: Sheet1
RNAscope probes
Target	Vendor	Catalog #	Channel
FABP7	Advanced Cell Diagnostics	583891	2
CD44	Advanced Cell Diagnostics	311271	3
CD68	Advanced Cell Diagnostics	560591	3
SPP1	Advanced Cell Diagnostics	420101	1
SCN10A	Advanced Cell Diagnostics	406291	2
Positive control: UBC>PPIB>POLR2A	Advanced Cell Diagnostics	320861	1-3
Negative control: dapB	Advanced Cell Diagnostics	320871	1-3
Primary Antibodies
Target	Vendor	Catalog #	Species	Polyclonal/Monoclonal	Specificity Notes	RRID	Dilution/Concentration
CD44	Abclonal	A19020	Rabbit	Monoclonal	KO validated	AB_2862512	2μg/mL
Peripherin	Encor Biotechnologies	cpca-peri	Chicken	Polyclonal	Human sensory neuron marker PMID: 33550628	AB_228443	1:1000
Nav1.7	NeuroMab	N68/6	Mouse	Monoclonal	KO validated PMID: 31550995; human sensory neuron marker PMID: 33550628	AB_2184355	2μg/mL
SOX10	Abcam	ab216020	Mouse	Monoclonal	Labels human tissue (data sheet)	AB_2847913	2μg/mL
GFAP	NeuroMab	N206A/8	Mouse	Monoclonal	KO validated	AB_2877343	2μg/mL
TH	Sigma	AB152	Rabbit	Polyclonal	Labels TH fibers in human symapethic chain ganglia and nerve	AB_390204	2μg/mL
CD31/PECAM-1	Invitrogen	14-0319-82	Mouse	Monoclonal	53 published papers (see datasheet)	AB_467204	2μg/mL
phospho-eIF4E	Abcam	ab76256	Rabbit	Monoclonal	KO validated	AB_1523534	2μg/mL
S100(A+B)	Fisher Scientific	MA126621	Mouse	Monoclonal	Published in many papers using human tissues for detection of Schwann cells. (see datasheet, ex: PMID 24123994)	AB_795376	2μg/mL
TRPV1	ThermoFisher	PA1-748	Rabbit	Polyclonal	Used on human DRG PMID: 33550628	AB_2209010	2μg/mL
Secondary Antibodies
Antibody	Vendor	Catalog #	Dilution
Goat-anti-mouse IgG1 555	Invitrogen	A-21127	1:2000
Goat-anti-chicken IgY H&L 488	Invitrogen	A-11039	1:2000
Goat-anti-rabbit IgG H&L 647	Invitrogen	A-21245	1:2000
Goat-anti-mouse IgG2b 647	Invitrogen	A-21242	1:2000
Goat-anti-rabbit IgG H&L 555	Invitrogen	A-21428	1:2000
